# Supplementary material for: A comprehensive review on the electrochemical parameters and recent material development of electrochemical water splitting electrocatalysts
Source: Royal Society of Chemistry journal article supplement (doi:10.1039/d2ra07642j), 2023-01-01
Supplement: d2ra07642j1.pdf [file d2ra07642j1.pdf]

# **A Comprehensive Review on the Electrochemical Parameters and Recent Material Development of Electrochemical Water Splitting Electrocatalysts**

*Asha Raveendran<sup>a</sup>, Mijun Chandran<sup>b</sup>, D. Ragupathy<sup>a\*</sup>*

<sup>a</sup>Nano Electrochemistry lab, Department of Chemistry, National Institute of Technology Puducherry, Karaikal - 609609, India

<sup>b</sup>Department of Chemistry, Central University of Tamil Nadu, Thiruvarur - 610005, India

Corresponding author e-mail: [ragu.nitpy@gmail.com](mailto:ragu.nitpy@gmail.com)

**Supporting Information**

**Table S1. Comparison table of bi-functional OER and HER activities of s, p & d block metal catalyst & noble metals based on performance and lifetime**

|                         |                                                                                                 |                                           | OER                                |                |                                           | HER                                |                | Overall water splitting    | Ref |
|-------------------------|-------------------------------------------------------------------------------------------------|-------------------------------------------|------------------------------------|----------------|-------------------------------------------|------------------------------------|----------------|----------------------------|-----|
| Block elements          | Catalysts                                                                                       | Overpotential (mV) @10mA cm <sup>-2</sup> | Tafel Slope (mVdec <sup>-1</sup> ) | Durability (h) | Overpotential (mV) @10mA cm <sup>-2</sup> | Tafel Slope (mVdec <sup>-1</sup> ) | Durability (h) | (V) @ 10mAcm <sup>-2</sup> |     |
| <b>s-block elements</b> | Ultrathin LiCoO <sub>2</sub>                                                                    | 410                                       | 88                                 | 1              | -                                         | -                                  | -              |                            | 117 |
|                         | MgRuO <sub>2</sub>                                                                              | 228                                       | 63.3                               | 30             | -                                         | -                                  | -              |                            | 118 |
|                         | RuBe-2                                                                                          | -                                         | -                                  | -              | 34.8                                      | 289                                | 50             |                            | 119 |
|                         | LaNiO <sub>3</sub>                                                                              | 1.438V                                    | 175                                | 2              | -                                         | -                                  | -              |                            | 120 |
|                         | 100nmBM-SCO                                                                                     | 500                                       | 118.2                              | 1              | -                                         | -                                  | -              |                            | 123 |
|                         | Ba <sub>0.5</sub> Sr <sub>0.5</sub> Co <sub>0.3</sub> Fe <sub>0.2</sub> O <sub>3-δ</sub> (BSCF) | 350                                       | 75                                 | -              | -                                         | -                                  | -              |                            | 124 |
|                         | Sr <sub>2</sub> PdO <sub>3</sub>                                                                | 500                                       | 454.1                              | 2.8            | -                                         | -                                  | -              |                            | 125 |
|                         | BaMoO <sub>3</sub>                                                                              | -                                         | -                                  | -              | 380                                       | 110                                | -              |                            | 128 |
|                         | De-LiCo <sub>0.5</sub> Ni <sub>0.5</sub> O <sub>2</sub>                                         | 1.61 V                                    | 42                                 | -              | -                                         | -                                  | -              |                            | 115 |
|                         | De-LiCo <sub>0.33</sub> Ni <sub>0.33</sub> Fe <sub>0.33</sub> O <sub>2</sub>                    | 1.525V                                    | 35                                 | -              | -                                         | -                                  | -              |                            | 115 |

|                         |                                                                              |                              |       |     |                              |      |    |      |     |
|-------------------------|------------------------------------------------------------------------------|------------------------------|-------|-----|------------------------------|------|----|------|-----|
|                         | De-LiCo <sub>0.33</sub> Ni <sub>0.33</sub> Mn <sub>0.33</sub> O <sub>2</sub> | 1.625V                       | 48    | -   | -                            | -    | -  |      | 115 |
|                         | DeLiCoO <sub>2</sub>                                                         | 1.61V                        | 50    | 2.5 | -                            | -    | -  |      | 115 |
|                         | De-LiCo <sub>0.5</sub> Fe <sub>0.5</sub> O <sub>2</sub>                      | 1.565V                       | 40    | -   | -                            | -    | -  |      | 115 |
| <b>p-block elements</b> |                                                                              |                              |       |     |                              |      |    |      |     |
|                         | Al-CoP/CC                                                                    | 265                          | 67    | -   | 53                           | 45   | 40 | 1.56 | 132 |
|                         | Al <sub>0.4</sub> Fe <sub>0.2</sub> Ni <sub>0.4</sub> O <sub>x</sub>         | 298 @<br>1mAcm <sup>-2</sup> | 11    | 24  | -                            | -    | -  |      | 133 |
|                         | PA-NiO                                                                       | 310                          | 36    | -   | 138                          | 81   | -  | 1.56 | 134 |
|                         | Al-NiMoO <sub>4</sub>                                                        | 131                          | 82    | 30  | 259@<br>50mAcm <sup>-2</sup> | 117  | 30 |      | 135 |
|                         | Ru <sub>3</sub> Al                                                           | -                            | -     | -   | 79                           | 81   | -  |      | 136 |
|                         | NiFeAlO <sub>4</sub>                                                         | 500                          | 37    | 15  | -                            | -    | -  |      | 137 |
|                         | Co <sub>1.75</sub> Al <sub>1.25</sub> O <sub>4</sub>                         | 248                          | 80.6  | 30  | -                            | -    | -  |      | 138 |
|                         | GaPd <sub>2</sub> /C                                                         | -                            | -     | -   | 24.3                         | 48.3 | 24 |      | 141 |
|                         | C-CoSe <sub>2</sub>                                                          | 227                          | 49.15 | 25  | -                            | -    | -  |      | 145 |
|                         | CoInSe <sub>4</sub>                                                          | 315                          | 67    | 20  | 103                          | 43   | -  | 1.6  | 146 |
|                         | GIZO                                                                         | 282                          | 121   | 10  | 271                          | 64   | 10 |      | 147 |

|                                           |                                         |                                |      |    |       |       |    |                                        |     |
|-------------------------------------------|-----------------------------------------|--------------------------------|------|----|-------|-------|----|----------------------------------------|-----|
|                                           | Sn doped Ni <sub>3</sub> S <sub>2</sub> | -                              | -    | -  | 137   | 148   | 10 |                                        | 150 |
|                                           | BFMO-2                                  | 266                            | 33   | 24 | 204   | 165   | 24 | 1.67                                   | 161 |
|                                           | MoB                                     | -                              | -    | -  | 210   | 55    | 45 |                                        | 167 |
|                                           | N-BCN                                   | 158.9                          | 65.2 | -  | 142.7 | 61.3  | 48 | 1.62<br>1.79@<br>100mAcm <sup>-2</sup> | 172 |
|                                           | BCNONF                                  | 403                            | 72.9 | 10 | 208   | 115.3 | 10 | 1.79                                   | 175 |
|                                           | TiSi                                    | -                              | -    | -  | 34    | 27.1  | -  |                                        | 176 |
|                                           | MnSi                                    | -                              | -    | -  | 39    | 27.3  | -  |                                        | 176 |
|                                           | MoAs                                    | -                              | -    | -  | 303   | 74    | 2  |                                        | 177 |
|                                           | CoTeNR/NT                               | 350@<br>100mA cm <sup>-2</sup> | 75   | 12 | 202   | 115   | -  | 1.64                                   | 187 |
|                                           | AgTe                                    | -                              | -    | -  | 27    | 33    | 6  |                                        | 189 |
| <b>d-block elements</b>                   |                                         |                                |      |    |       |       |    |                                        |     |
| <i>Transition carbides &amp; Nitrides</i> |                                         |                                |      |    |       |       |    |                                        |     |
|                                           | Ni-Mo <sub>2</sub> C@C                  | -                              | -    | -  | 72    | 65.6  | 24 |                                        | 192 |

|  |                                               |                               |       |     |      |     |   |                                                                                                |     |
|--|-----------------------------------------------|-------------------------------|-------|-----|------|-----|---|------------------------------------------------------------------------------------------------|-----|
|  | Co <sub>2</sub> P@Co <sub>2</sub> P/Co-POM/NF | 336                           | 37    | -   | 130  | 135 | - | 1.6                                                                                            | 193 |
|  | CoMoS                                         | 272                           | 45    | -   | 97   | 70  | - | 1.6                                                                                            | 194 |
|  | Co <sub>16</sub> -GeW <sub>9</sub> @NF        | 370                           | 84    | 8   | -    | -   | - | -                                                                                              | 196 |
|  | H <sub>5</sub> l@ZIF8                         | 375                           | 188   | 3   | -    | -   | - | -                                                                                              | 197 |
|  | Co-NC-POM                                     | 400                           | 94    | -   | 133  | 124 | - | 1.6                                                                                            | 199 |
|  | Porous Mo <sub>2</sub> C@C<br>(1M KOH)        | -                             | -     | -   | 151  | 59  | - |                                                                                                | 204 |
|  | γ-Mo <sub>2</sub> N                           | -                             | -     | -   | 381  | 108 | - |                                                                                                | 206 |
|  | O-MoNi-C/NF                                   | 190                           | 65.35 | 100 | -    | -   | - | 1.47                                                                                           | 210 |
|  | 2D-W <sub>2</sub> N <sub>3</sub>              | -                             | -     | -   | 98.2 | 59  | - |                                                                                                | 211 |
|  | CoN                                           | 290                           | 70    | -   | -    | -   | - |                                                                                                | 212 |
|  | HFN                                           | 358                           | 85    | -   | -    | -   | - |                                                                                                | 212 |
|  | NiMoN-NF700                                   | 290@<br>50mA cm <sup>-2</sup> | 46    | 5   | 40   | 29  | 5 | 1.498<br>@20mAcm-<br>2<br><br>1.532<br>@50mAcm-<br>2<br><br>1.559<br>@100mA<br>m <sup>-2</sup> | 213 |

|                                            |                                                     |     |       |    |     |       |     |                                         |     |
|--------------------------------------------|-----------------------------------------------------|-----|-------|----|-----|-------|-----|-----------------------------------------|-----|
|                                            | CoFe-N-CN/CNTs                                      | 285 | 51.09 | 15 | -   | -     | -   |                                         | 217 |
|                                            | MoS <sub>2</sub> -VN(CTAB)                          | -   | -     | -  | 85  | 53.31 | 30  |                                         | 218 |
| <b>Transition<br/>Metal<br/>Phosphides</b> |                                                     |     |       |    |     |       |     |                                         |     |
|                                            | s-Ni <sub>5</sub> P <sub>4</sub> NPA/CP             | -   | -     | -  | 56  | 43.6  | 100 |                                         | 219 |
|                                            | Zn <sub>0.075</sub> Co <sub>0.925</sub> PNRCs/CP    | 419 | 99.7  | 20 | 86  | 80.1  | 20  | 1.70                                    | 220 |
|                                            | B-CoP/CNT<br>(0.5M H <sub>2</sub> SO <sub>4</sub> ) | -   | -     | -  | 39  | 50    | 100 |                                         | 221 |
|                                            | O-NiMoP <sub>2</sub> /Ni                            | -   | -     | -  | 31  | 62.11 | 30  |                                         | 222 |
|                                            | NF@Fe <sub>2</sub> -Ni <sub>2</sub> P/C             | 205 | 52    | -  | 39  | 30    | -   | 1.5<br>1.57<br>@100mA<br>1.66<br>@500mA | 223 |
|                                            | Sc-Ni <sub>2</sub> P <sup>δ-</sup> /NiHO            | -   | -     | -  | 170 | 75    | 100 |                                         | 224 |
|                                            | Fe-CoP HNSs                                         | 220 | 65.8  | 20 | 79  | 60.4  | 20  | 1.55                                    | 225 |
|                                            | NiP/C                                               | 260 | 43    | 25 | -   | -     | -   |                                         | 226 |
|                                            | Fe <sub>2</sub> O <sub>3</sub> @C@CoP               | 230 | 55    | 25 | -   | -     | -   |                                         | 227 |
|                                            | Ni/Co doped MoP                                     | -   | -     | -  | 102 | 58.1  | 10  |                                         | 228 |







|  |                          |                                |      |     |      |      |    |  |     |
|--|--------------------------|--------------------------------|------|-----|------|------|----|--|-----|
|  | o-Ru-O/A@HNC-2           | 234                            | 63.8 | ≈10 | 85   | 72.5 | -  |  | 251 |
|  | NiFeIrLDH                | 200                            | -    | 50  | 34   | 32   | -  |  | 252 |
|  | Ir-NiCoLDH               | 192                            | 47   | -   | 21   | 35   | 2  |  | 253 |
|  | NiVrIrLDH                | 203                            | 55.3 | -   | 41   | 35.9 | -  |  | 254 |
|  | Rh- doped CoTe-ZLDH      | 245@<br>100mA cm <sup>-2</sup> | -    | -   | 28   | 42.8 | 10 |  | 255 |
|  | Al-Pt/Pd <sub>3</sub> Pb | -                              | -    | -   | 13.8 | 18   | 25 |  | 258 |
|  | Ru nanosheet             | 260                            | 54   | -   | 20   | 46   | -  |  | 256 |
|  | Mesoporous Ir nanosheets | 240                            | 498  | -   | -    | -    | -  |  | 260 |
